# Supplementary material
Source: publisher figshare collection journal article supplement (https://tandf.figshare.com/articles/dataset/_/19907114)

Figure S1. Flowchart demonstrating the process of inclusion and exclusion of papers in the review (N=the number of studies)

Identification

Screening

Eligibility

Included

Full-text articles assessed for eligibility

(N=71)

Studies included in synthesis

(N=33)

Additional records identified through citation search of reference list

(N=5)

Records after removing articles published before 2010

(N=1908)

Records identified through database searching

(N=3403)

Records after abstract screening

(N=75)

Records after title screening

(N=303)

Records of the studies investigating the correlates of children’s outdoor playing

(N=66)

(N=303)

Records of the studies exploring the functions of digital interventions in stimulating children’s outdoor playing

(N=9)

Full-text articles assessed for eligibility

(N=11)

Studies included in synthesis

(N=10)

Additional records identified through citation search of reference list

(N=2)

Figure S2. The overview of the findings and recommendations for future research


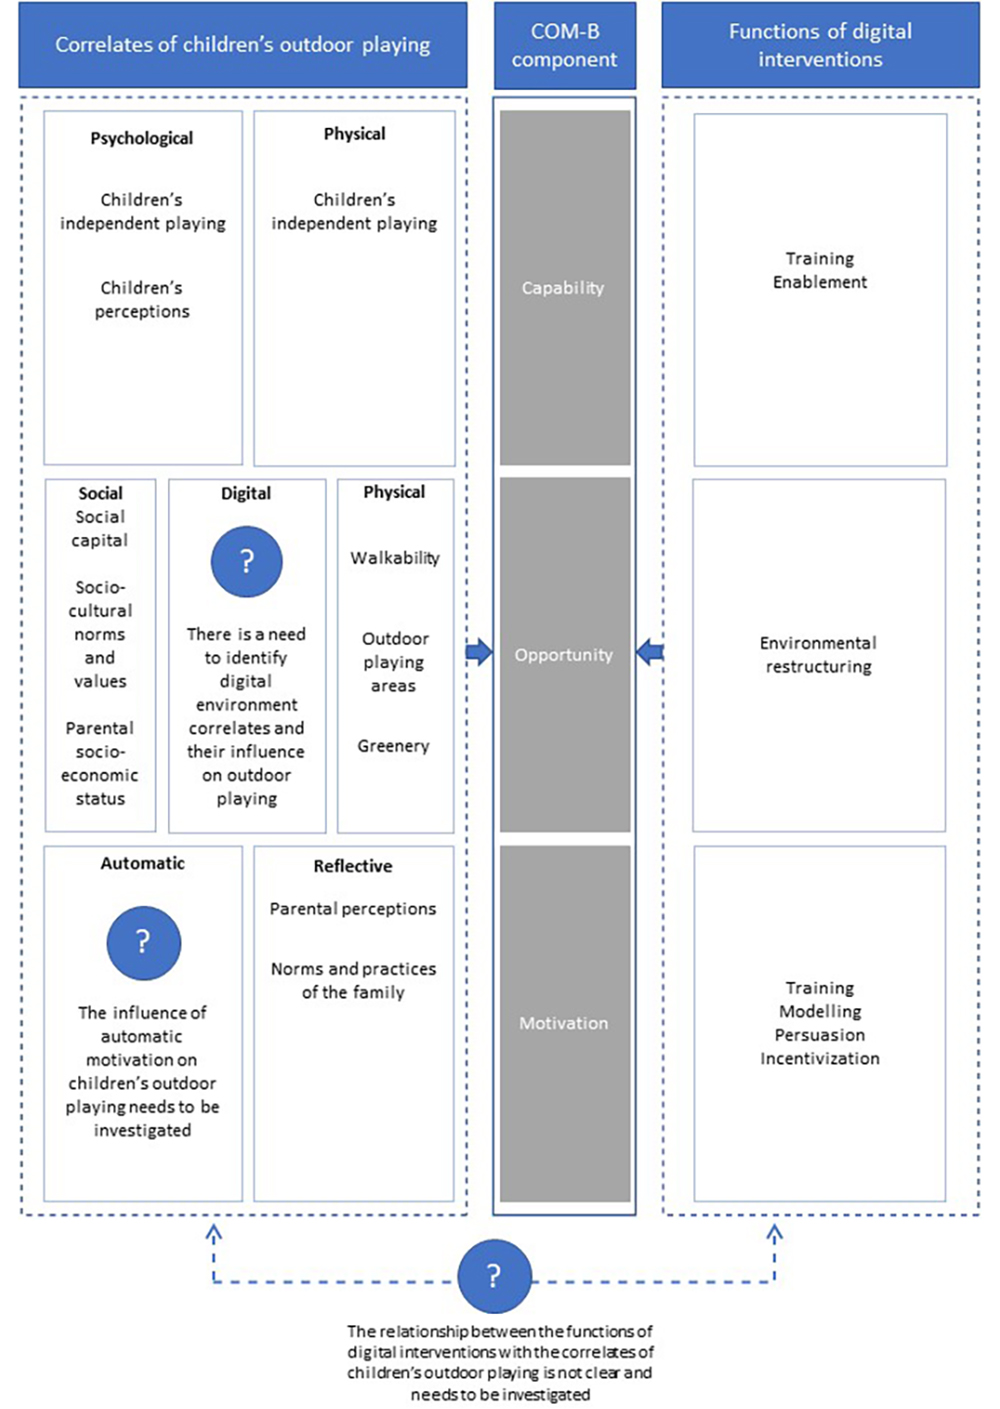

Supplement: Supplementary file 1 [file 1]
